# Supplementary material for: Predicting near-term variability in ocean carbon uptake
Source: Copernicus journal article supplement (doi:10.5194/esd-10-45-2019), 2019-01-24
Supplement: Supplementary file 1 [file esd-10-45-2019-supplement.pdf]

Supplement of Earth Syst. Dynam., 10, 45–57, 2019  
<https://doi.org/10.5194/esd-10-45-2019-supplement>  
© Author(s) 2019. This work is distributed under  
the Creative Commons Attribution 4.0 License.

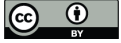

*Supplement of*

## **Predicting near-term variability in ocean carbon uptake**

**Nicole S. Lovenduski et al.**

*Correspondence to:* Nicole S. Lovenduski ([nicole.lovenduski@colorado.edu](mailto:nicole.lovenduski@colorado.edu))

The copyright of individual parts of the supplement might differ from the CC BY 4.0 License.

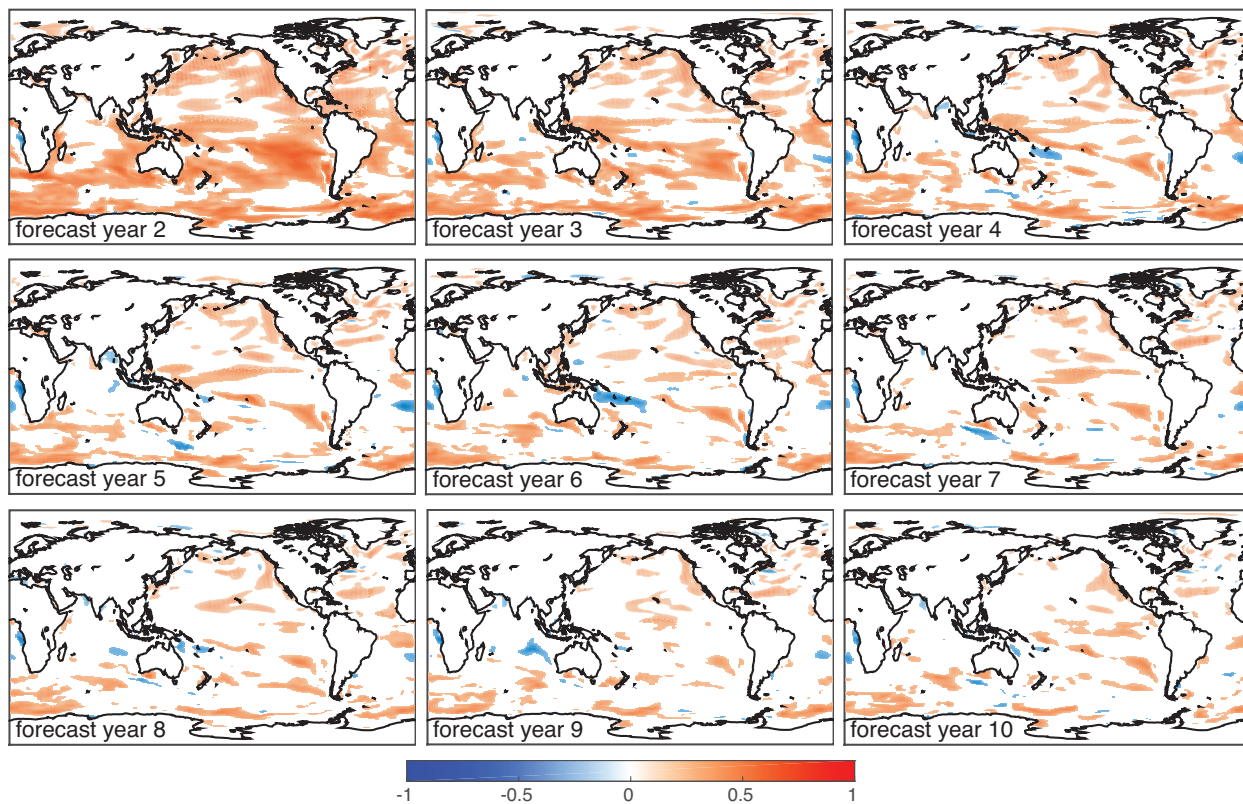

**Figure S1.** Predictability of air-sea CO<sub>2</sub> flux, as indicated by the correlation coefficient of detrended, air-sea CO<sub>2</sub> flux anomalies from the CESM-DPLE initialized forecast for a range of lead years with the reconstruction. Correlation coefficients that are not statistically significant at the 95% level using a *t* test are assigned a value of zero.
